# Supplementary material for: Gene length corrected trimmed mean of M-values (GeTMM) processing of RNA-seq data performs similarly in intersample analyses while improving intrasample comparisons
Source: PubMed Central journal article supplement (PMC6013957; doi:10.1186/s12859-018-2246-7), 2018-06-22

| gene   | length (kb) | Readcounts |         | RPK     |         |
|--------|-------------|------------|---------|---------|---------|
|        |             | sample1    | sample2 | sample1 | sample2 |
| gene1  | 0.25        | 70         | 78      | 280.00  | 312.00  |
| gene2  | 0.5         | 251        | 157     | 502.00  | 314.00  |
| gene3  | 0.75        | 201        | 235     | 268.00  | 313.33  |
| gene4  | 1           | 183        | 314     | 183.00  | 314.00  |
| gene5  | 1.25        | 339        | 392     | 271.20  | 313.60  |
| gene6  | 1.5         | 572        | 471     | 381.33  | 314.00  |
| gene7  | 1.75        | 480        | 549     | 274.29  | 313.71  |
| gene8  | 2           | 754        | 628     | 377.00  | 314.00  |
| gene9  | 2.25        | 759        | 706     | 337.33  | 313.78  |
| gene10 | 2.5         | 904        | 785     | 361.60  | 314.00  |

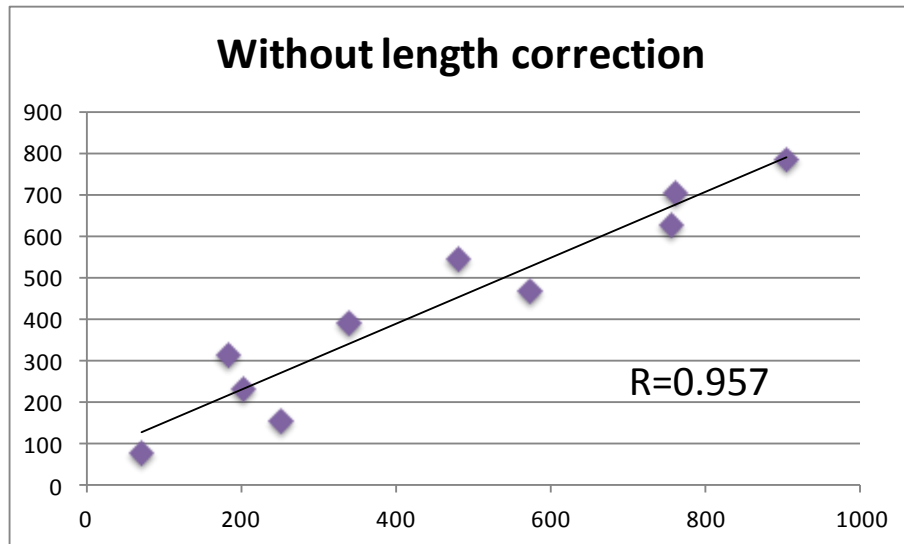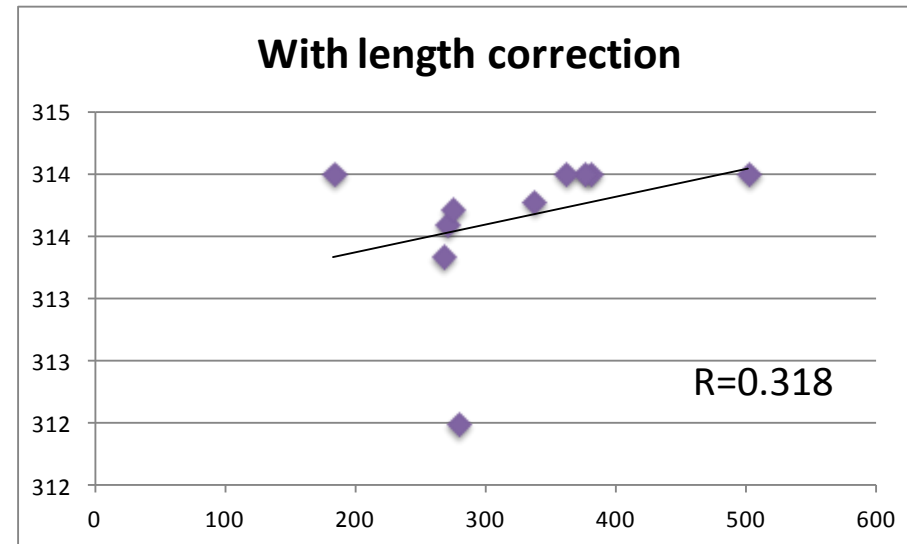

Supplement: 12859_2018_2246_MOESM1_ESM.pdf [file 12859_2018_2246_MOESM1_ESM.pdf]
