# Supplementary material for: Gene length corrected trimmed mean of M-values (GeTMM) processing of RNA-seq data performs similarly in intersample analyses while improving intrasample comparisons
Source: PubMed Central journal article supplement (PMC6013957; doi:10.1186/s12859-018-2246-7), 2018-06-22

**TRAINING:** [y=RIN BioAnalyzer, x=RIN MultiNA Conc. 28S/Total Conc]

Training set: Total RNA isolated with RNA-B from 60 freshly frozen breast tumor tissues

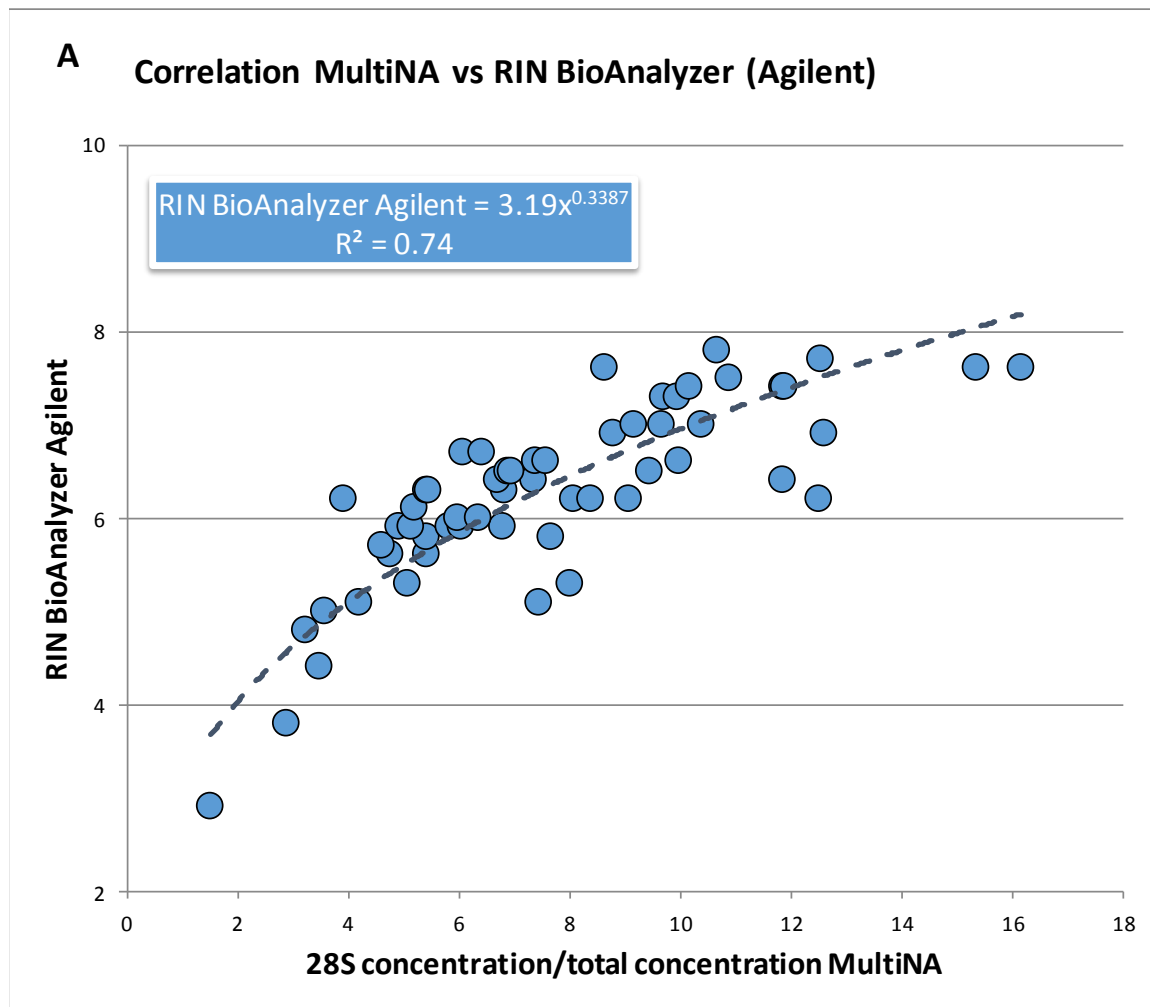

**VALIDATION:** [RIN MultiNA =  $3.19 * (28S \text{ Conc.}/\text{total RNA Conc.} * 100)^{0.3387}$

Testing set: Total RNA isolated with RNA-B from 73 independent freshly frozen breast tumor tissues

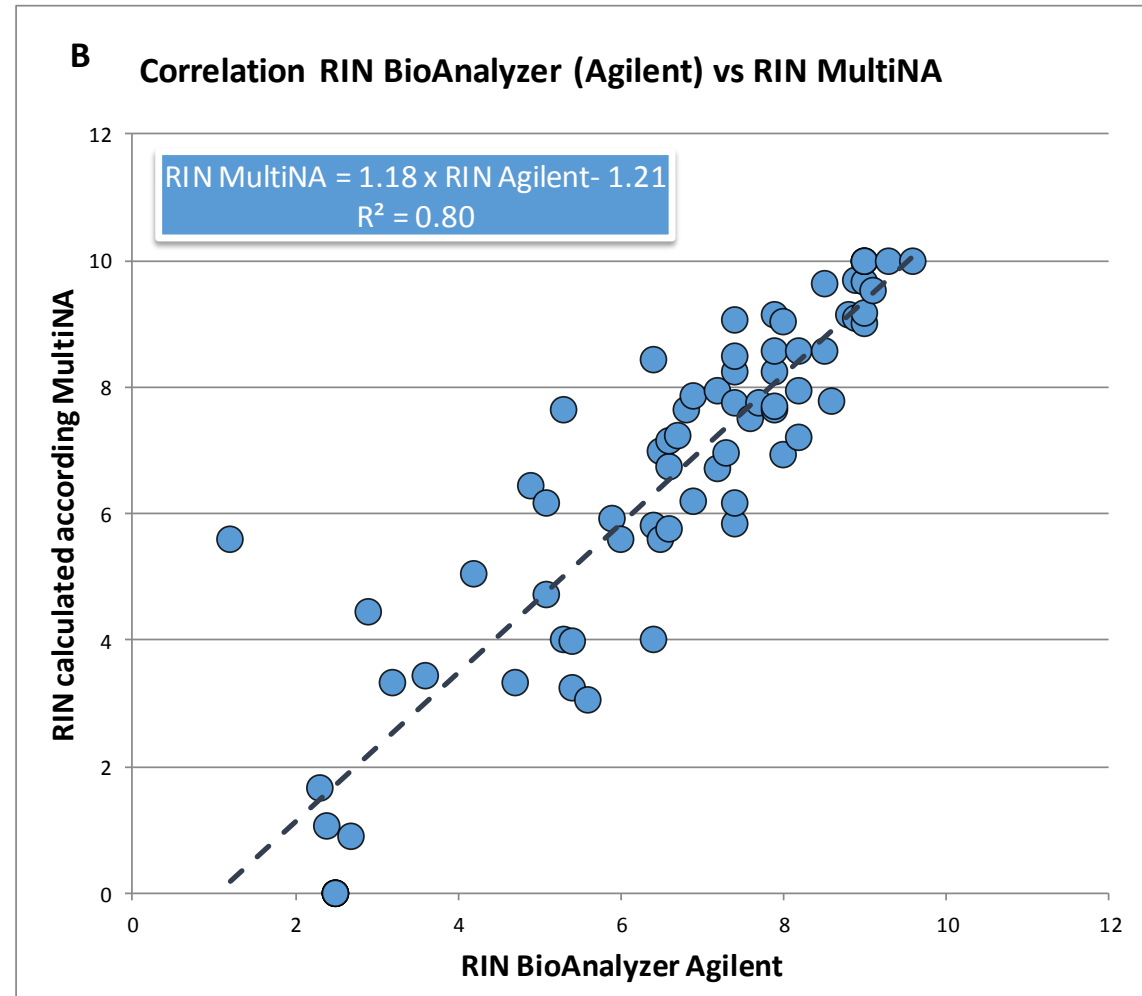

Supplement: 12859_2018_2246_MOESM2_ESM.pdf [file 12859_2018_2246_MOESM2_ESM.pdf]
