# Supplementary material for: Gene length corrected trimmed mean of M-values (GeTMM) processing of RNA-seq data performs similarly in intersample analyses while improving intrasample comparisons
Source: PubMed Central journal article supplement (PMC6013957; doi:10.1186/s12859-018-2246-7), 2018-06-22

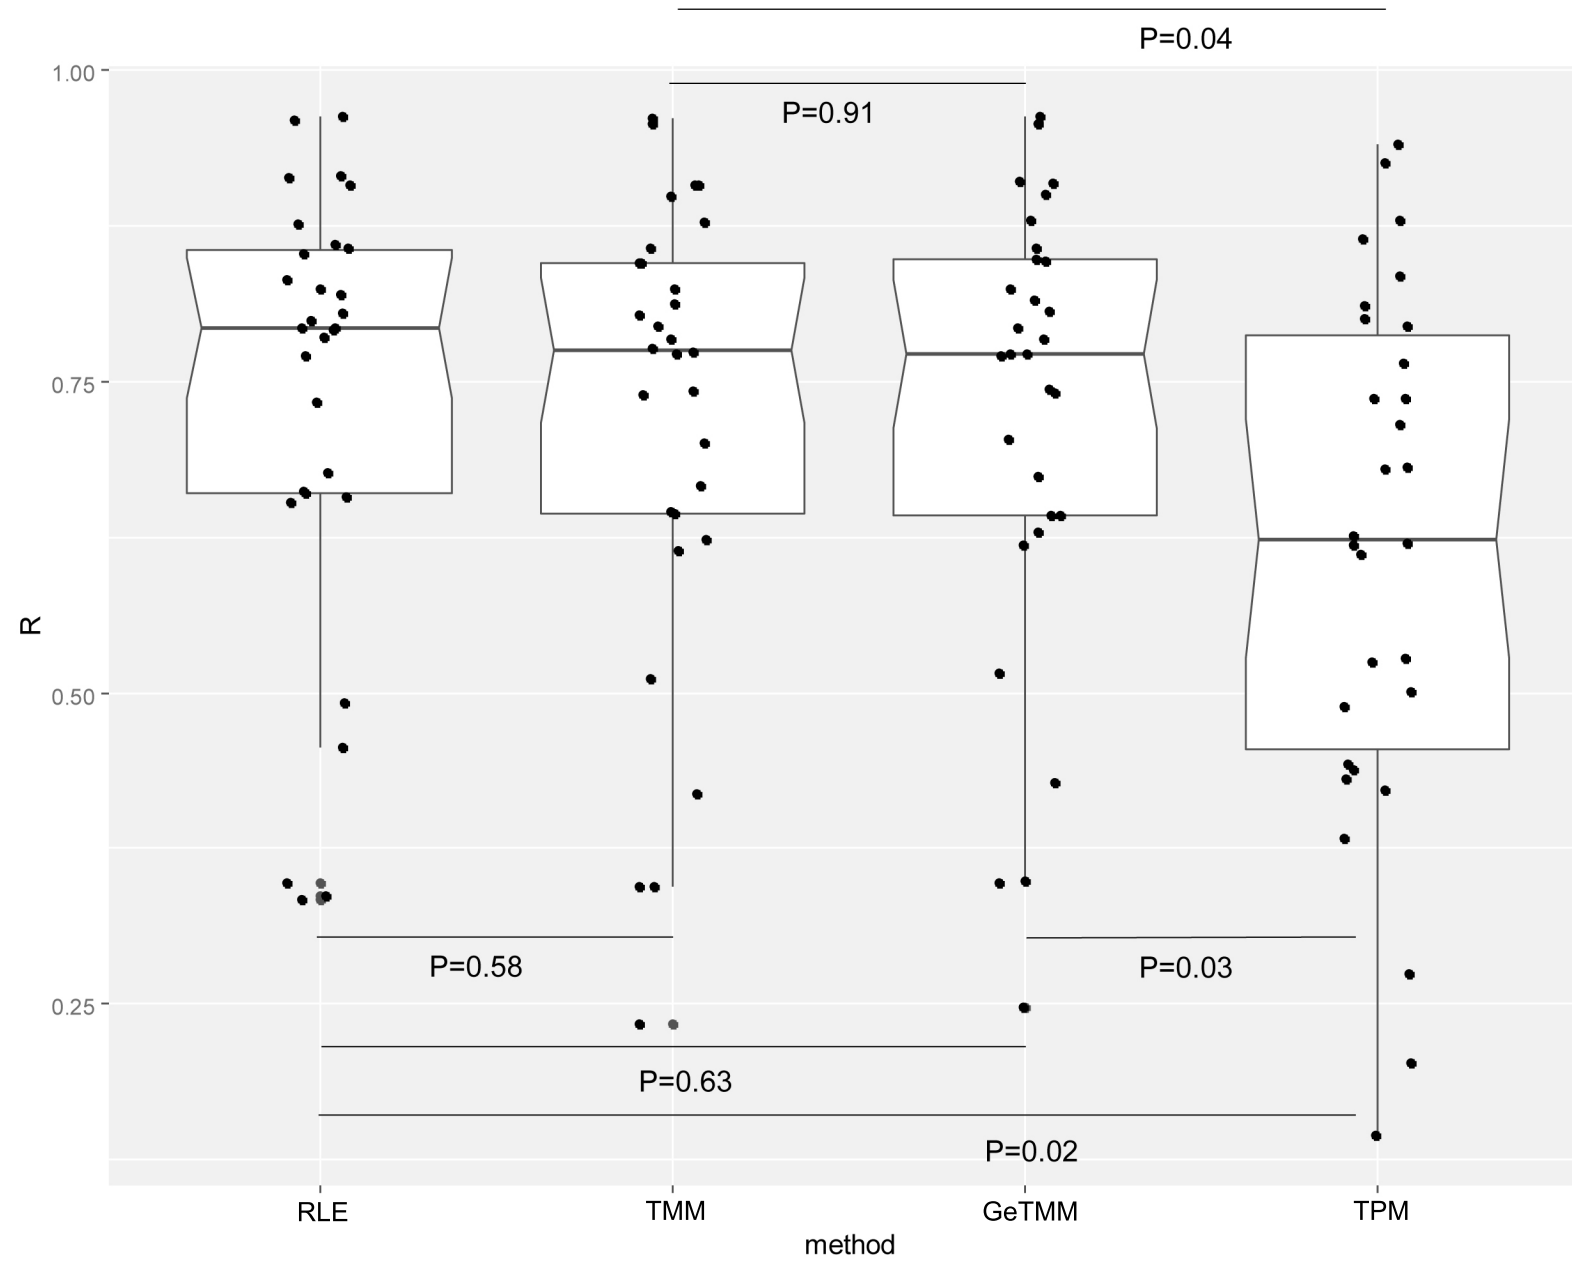

Supplement: 12859_2018_2246_MOESM7_ESM.pdf [file 12859_2018_2246_MOESM7_ESM.pdf]
